# Supplementary material for: Convolutional Neural Network Addresses the Confounding Impact of CT Reconstruction Kernels on Radiomics Studies
Source: MDPI journal article supplement (doi:10.3390/tomography7040074), 2021-12-03
Supplement: s1 [file s1]

## Supplementary Materials

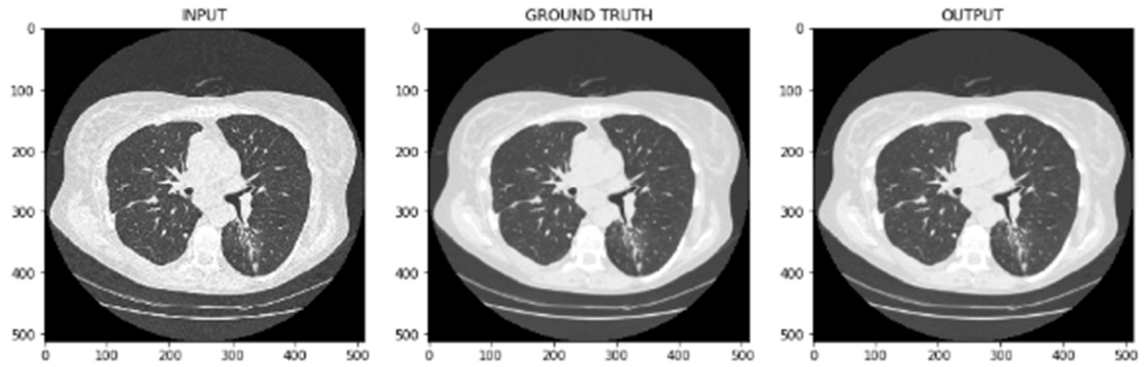

**Figure S1.** CNN kernel conversion example. An example of kernel conversion using the developed CNN network from sharp kernel (Input) to smooth kernel (Ground Truth). CT images of input (sharp), ground truth (smooth), and output (sharp  $\rightarrow$  conv\_smooth) are shown, respectively.

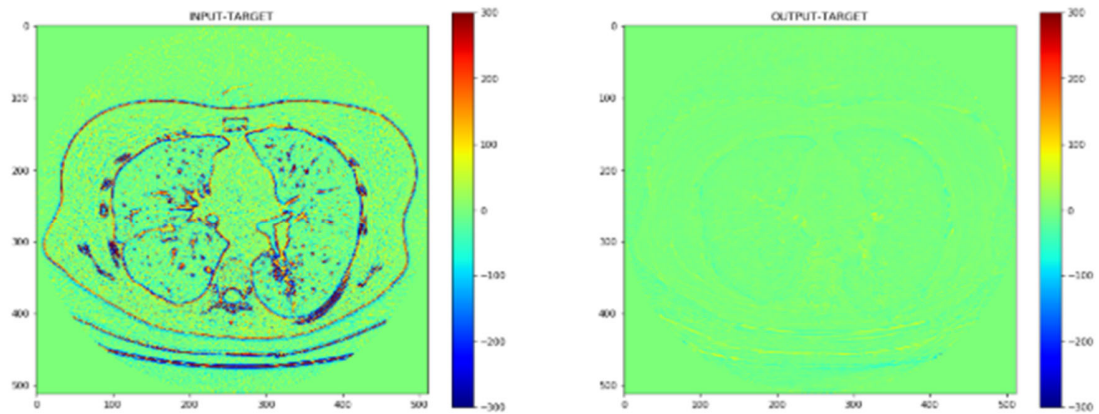

**Figure S2.** Difference maps. The difference maps are shown to show how much differences there are in the CT images between the input (sharp) and the target (smooth or ground truth) and between the output (conv\_smo) and the target (smooth or ground truth). There was a 99% decrease in RMSE after CNN kernel conversion.

**Table S1.** CT image scanner parameters for the development cohort.

| Scanning parameters      | GE LightSpeed 16 (n = 28)       | GE VCT (n = 4)                  |
|--------------------------|---------------------------------|---------------------------------|
| Tube voltage             | 120 kVp                         | 120 kVp                         |
| Tube current             | 299-441 mA                      | 298-351 mA                      |
| Collimator configuration | 16 x 1.25 mm                    | 64 x 0.63 mm                    |
| Pitch                    | 1.375                           | 0.984                           |
| In-plane resolution      | 0.51 x 0.51 – 0.90 x 0.90       | 0.50 x 0.50 – 0.87 x 0.87       |
| Slice thickness          | 1.25 mm                         | 1.25 mm                         |
| Reconstruction algorithm | Smooth: Standard<br>Sharp: Lung | Smooth: Standard<br>Sharp: Lung |
| Contrast                 | No                              | No                              |

**Table S2.** CT image scanner parameters for the validation cohort.

| Scanning parameters      | Siemens Perspective (n = 86) | Siemens Sensation 64 (n = 50)        | Siemens SOMATOM Definition AS (n = 12) | Siemens SOMATOM Definition Flash (n = 75)     |
|--------------------------|------------------------------|--------------------------------------|----------------------------------------|-----------------------------------------------|
| Tube voltage (kVp)       | 110 and 130                  | 120                                  | 120                                    | 120                                           |
| Tube current (mA)        | 52 – 329                     | 151 – 415                            | 184 – 661                              | 102 – 691                                     |
| Exposure (mAs)           | 600                          | 500                                  | 330 and 500                            | 500                                           |
| Slice interval (mm)      | 0.7, 0.9 and 1               | 0.8, 0.9 and 1                       | 0.9 and 1                              | 0.7, 0.8 and 1                                |
| Slice thickness (mm)     | 1                            | 1                                    | 1                                      | 1                                             |
| Pixel spacing (mm)       | 0.48 – 0.81                  | 0.58 – 0.81                          | 0.57 – 0.71                            | 0.53 – 0.83                                   |
| Reconstruction algorithm | Smooth: B31s<br>Sharp: B70s  | Smooth: B30f and B31f<br>Sharp: B70f | Smooth: B31f<br>Sharp: B70f and B80f   | Smooth: B30f and B31f<br>Sharp: B60f and B70f |

**Table S3.** A summary table for features groups analyzed in the development cohort.

| Group # | Feature Name(s)                                                                                                                                |
|---------|------------------------------------------------------------------------------------------------------------------------------------------------|
| 1       | Shape_Index_8                                                                                                                                  |
| 2       | GTDM_Strength, GTDM_Coarseness, EdgeFreq_Coarseness                                                                                            |
| 3       | Sigmoid_Offset_Mean                                                                                                                            |
| 4       | Shape_Index_2, Shape_Index_3, Shape_Index_4, Shape_Index_5, Run_PLU, Run_GLU, Uni_2D, Bi_2D, Vol, Uniformity_p4                                |
| 5       | LoG_Entropy_p4                                                                                                                                 |
| 6       | Sigmoid_Amplitude_Mean, Intensity_Mean_2D, Intensity_Mean_3D, GLCM_Sum_Average, GLCM_Sum_Variance                                              |
| 7       | Eccentricity                                                                                                                                   |
| 8       | Spatial                                                                                                                                        |
| 9       | Shape_Index_9                                                                                                                                  |
| 10      | Solidity, Compact_Factor, Round_Factor                                                                                                         |
| 11      | LoG_MGI_p1, LoG_MGI_p4                                                                                                                         |
| 12      | DWT_LH, DWT_H, Gabor_dir90                                                                                                                     |
| 13      | Intensity_Std_2D, Intensity_Std_3D, Laws_1, GLCM_Contrast, GLCM_Sum_Squares, Cluster, Laws_2, Laws_3, Laws_5, Laws_6, Laws_8, Laws_11, Laws_12 |
| 14      | Intensity_Kurtosis_3D, Intensity_Kurtosis_2D                                                                                                   |
| 15      | EdgeFreq_Contrast, GTDM_Contrast                                                                                                               |
| 16      | Gabor_dir0, DWT_V, DWT_LV, DWT_LD, Gabor_dir45, DWT_D, Gabor_dir135, Gabor_sum                                                                 |
| 17      | Shape_Index_6, Shape_Index_7                                                                                                                   |
| 18      | Intensity_Skewness_2D, Intensity_Skewness_3D, GLCM_Entropy, GLCM_Diff_Entropy, Run_SPE, Run_PP, EdgeFreq_Mean, LoG_Entropy_p1                  |
| 19      | Run_LPE                                                                                                                                        |
| 20      | GLCM_IMC1, Fractal                                                                                                                             |
| 21      | GLCM_IMC2, GLCM_Corr, GLCM_MCC                                                                                                                 |
| 22      | Laws_10, Laws_4, Laws_7, Laws_9, Laws_13, Laws_14, GTDM_Complexity                                                                             |
| 23      | Sigmoid_Slope                                                                                                                                  |

**Table S4.** CCC heatmap for the development cohort with CCC values.

| Groups | a) Original<br>smooth vs sharp | b) smooth vs conv_smooth<br>(ori_sharp -> conv_smooth) | c) sharp vs conv_sharp<br>(ori_smooth -> conv_smooth) |
|--------|--------------------------------|--------------------------------------------------------|-------------------------------------------------------|
| 1      | 0.928                          | 0.928                                                  | 0.928                                                 |
| 2      | 0.876                          | 0.950                                                  | 0.873                                                 |
| 3      | 0.922                          | 0.977                                                  | 0.975                                                 |
| 4      | 0.884                          | 0.928                                                  | 0.957                                                 |
| 5      | 0.833                          | 0.873                                                  | 0.859                                                 |
| 6      | 0.843                          | 0.935                                                  | 0.930                                                 |
| 7      | 0.811                          | 0.811                                                  | 0.811                                                 |
| 8      | 0.515                          | 0.893                                                  | 0.788                                                 |
| 9      | 0.856                          | 0.856                                                  | 0.856                                                 |
| 10     | 0.835                          | 0.835                                                  | 0.835                                                 |
| 11     | 0.624                          | 0.889                                                  | 0.616                                                 |
| 12     | 0.552                          | 0.770                                                  | 0.780                                                 |
| 13     | 0.562                          | 0.811                                                  | 0.780                                                 |
| 14     | 0.361                          | 0.846                                                  | 0.568                                                 |
| 15     | 0.503                          | 0.802                                                  | 0.832                                                 |
| 16     | 0.425                          | 0.741                                                  | 0.749                                                 |
| 17     | 0.717                          | 0.717                                                  | 0.717                                                 |
| 18     | 0.245                          | 0.876                                                  | 0.744                                                 |
| 19     | 0.162                          | 0.788                                                  | 0.744                                                 |
| 20     | 0.128                          | 0.541                                                  | 0.656                                                 |
| 21     | 0.135                          | 0.556                                                  | 0.553                                                 |
| 22     | 0.191                          | 0.492                                                  | 0.481                                                 |
| 23     | -0.040                         | 0.068                                                  | 0.049                                                 |
